# Supplementary material for: Nutritional Status and Food Insecurity in Migrant Populations at the Mexico–Guatemala Border: A Case Study in Tenosique, Tabasco
Source: Research Square preprint supplement (doi:10.21203/rs.3.rs-7125080/v1), 2025-08-12
Supplement: Supplementary file 1 [file 49ba9cd2a0a8c6dbdfd7e9f0.docx]

Appendix 1:

EXPERIENCE-BASED FOOD INSECURITY ASSESSMENT TOOL

**Q1.** Have you ever worried about not having enough food to eat due to lack of money or other resources?

Yes No

**Q2.** Thinking back over the last 12 months, was there ever a time when you were unable to eat healthy, nutritious food because of lack of money or other resources?

Yes No

**Q3**. Was there ever a time when you ate a small variety of foods due to lack of money or other resources?

Yes No

**Q4.** Was there ever a time when you had to skip breakfast, lunch or dinner because there was not enough money or other resources to obtain food?

Yes No

**Q5**. Thinking back over the last 12 months, was there ever a time when you ate less than you thought you should because of lack of money or other resources?

Yes No

**Q6.** Has your household ever run out of food due to lack of money or other resources?

Yes No

**Q7.** Was there ever a time when you felt hungry, but did not eat because there was not enough money or other resources to obtain food?

Yes No

**Q8**. Was there ever a time when you stopped eating for a whole day due to lack of money or other resources?

Yes No
